# Supplementary material
Source: PubMed Central journal article supplement (PMC5385608)
Supplement: cr201711x1.pdf [file cr201711x1.pdf]

Supplementary Table 1. miRNA hits on *IL4Ra*

| Rfam ID        | Start | End | Alignment                                                                                         |
|----------------|-------|-----|---------------------------------------------------------------------------------------------------|
| mmu-miR-141*   | 777   | 798 | AGGUUGUGACGUGACCUUCUAC<br>  ::       :            <br>TCTGACTGTGTCTGGAGATG                        |
| mmu-miR-763    | 357   | 378 | CGGUGACCAAGAAGGGUCGACC<br>  ::                     <br>GCTGCTGGACGCTCCCAGCTGG                     |
| mmu-miR-302a   | 49    | 71  | aGUGGUUUUGUACCUUCGUGAAu<br>        :           :        <br>cCTCCAAGCCAGGGAAGTACTTc               |
| hsa-miR-658    | 508   | 532 | ugguugCCUGGAUGAAGGGAGGCGG<br>  :     :     :           :<br>gaggcaGAGCCTGCTGTCCCTCCGCT            |
| mmu-miR-188-5p | 192   | 213 | GGGAGGUGGUA-CGUUCCCUAc<br>  :                                <br>CTCTCCTCCCTCCCAGGGATa            |
| hsa-miR-502-5p | 725   | 745 | AUCGUGGUCUAUCGUCCUA<br>  :   : :       :   :   :          <br>TGGTGGTCAGGTGGTAGGGAT               |
| mmu-miR-412    | 721   | 739 | GCCGAUCACCUGGUCCACUu<br>:     :         :           :<br>TGGTTGGTGG-TCAGGTGGt                     |
| mmu-miR-484    | 760   | 781 | uAGCCUCCCCUGACUCGGACU<br>  :     :                          <br>tTTGGTGAGTGAGTGAGTCTGA            |
| mmu-miR-128a   | 209   | 229 | UUUCUCUGGCCAAGUGACACu<br>: :                                <br>GGATACAGGGGCTCACTGTGc             |
| mmu-miR-763    | 259   | 280 | cgguGACCAGAAGGGUCGACc<br>        :       :                <br>agtcCTGGGCTTCTTAGCTGa               |
| mmu-miR-876-5p | 89    | 110 | AUCACUAAAGUGUCUUAAGGU<br>  :   :   :                          <br>TGGCAGGTTTCCCAGAAATCCA          |
| hsa-miR-554    | 489   | 509 | UGACCGACUCAGUCCUGAUCg<br>          : :                      <br>ACAGCCAGGACTGGGACTAGa             |
| hsa-miR-623    | 190   | 212 | uggguugucGGGACGUUCCCUA<br>      :                                <br>ggetctctcctCCCTCCCAGGGAT     |
| mmu-miR-484    | 498   | 521 | UAGCCCU--CCCCUGACUCGGACu<br>  :                                      <br>ACTGGGACTAGAGGCGAGGCCTGc |
| mmu-miR-804    | 377   | 400 | aggUCCACUC--CUUGUUGAGUGU<br>        :   :                          <br>ggaAGCTGGGCCTAGAAACTACA    |
| hsa-miR-941    | 630   | 653 | cguguacacGUGU-GUCGGCCAC<br>        :                                <br>ataaacaaaCACAGTGCCTGGGTG  |
| mmu-miR-151-5p | 181   | 201 | UGAUCUGACACUCGAGGAGcu<br>      :                                <br>ACTGGCCTGGGCTCTCCTCcc         |
| mmu-miR-324-5p | 604   | 625 | UGUGGUUACGGGAUCCCUACGC<br>  :       :     :                      <br>AAGCCAGGGCTC-CTGGGATGTG      |
| mmu-miR-719    | 8     | 29  | UUGUAAAAGACAUCCGGUCUA<br>  : :     :           :       :        <br>AGTGTGC TGTGTGCTGAGGT         |
