# Supplementary material
Source: PubMed Central journal article supplement (PMC5385608)
Supplement: cr201711x2.pdf [file cr201711x2.pdf]

**Supplementary Table 2: SSc Patients and Normal Controls information**

| No. | Age | Gender | History of SS (month) | Clinical symptom                    | Previous treatment                                                            | No. | Age | Gender | History of SS (month) |
|-----|-----|--------|-----------------------|-------------------------------------|-------------------------------------------------------------------------------|-----|-----|--------|-----------------------|
| 1   | 50  | F      | 326                   | RP, hardening skin, ANA+, Scl70+    | Pred 7.5mg/day, CYC 0.4g/2weeks, ASP 100mg/day                                | 1   | 39  | M      | -                     |
| 2   | 31  | F      | 77                    | RP, hardening skin, ANA+, Scl70+    | Pred 5mg/day, Penicillamine 0.375g/day, ASP 100mg/day                         | 2   | 66  | F      | -                     |
| 3   | 26  | F      | 40                    | RP, hardening skin, ANA+, Scl70+    | Pred 5mg/day, Alprostadil 10µg/day, ASP 100mg/day                             | 3   | 64  | F      | -                     |
| 4   | 53  | F      | 124                   | RP, hardening skin, ANA+, Scl70+    | Pred 25mg/day, Alprostadil 10µg/day, ASP 100mg/day                            | 4   | 59  | F      | -                     |
| 5   | 58  | F      | 62                    | RP, hardening skin, ANA+            | Pred 20mg/day, ASP 100mg/day                                                  | 5   | 36  | F      | -                     |
| 6   | 49  | F      | 23                    | RP, hardening skin, ANA+, Scl70+    | Pred 20mg/day, MTX 10mg/week, ASP 100mg/day                                   | 6   | 45  | F      | -                     |
| 7   | 44  | F      | 241                   | RP, hardening skin, ANA+, Scl70+    | Pred 25mg/day, MTX 15mg/week, ASP 100mg/day                                   | 7   | 68  | M      | -                     |
| 8   | 53  | M      | 237                   | RP, hardening skin, ANA+, Scl70+    | Alprostadil 10µg/day, ASP 100mg/day, CYC 0.4g/2weeks                          | 8   | 41  | F      | -                     |
| 9   | 59  | M      | 20                    | RP, hardening skin, ANA+            | Pred 10mg/day, Penicillamine 0.375g/day, Alprostadil 20µg/day, HCQ 400mg/day  | 9   | 33  | F      | -                     |
| 10  | 81  | F      | 78                    | RP, hardening skin, ANA+, Scl70+    | Pred 5mg/day, HCQ 400mg/day, CYC 0.4g/2weeks                                  | 10  | 48  | F      | -                     |
| 11  | 63  | F      | 276                   | RP, hardening skin, ILD, arthralgia | Pred 5mg/day, CYC 0.4g/2weeks, ASP 100mg/day,                                 | 11  | 54  | F      | -                     |
| 12  | 35  | F      | 40                    | RP, hardening skin, ANA+, ILD       | Pred 5mg/day, CYC 0.4g/2weeks, Penicillamine 0.375g/day, Alprostadil 20µg/day | 12  | 47  | F      | -                     |
| 13  | 49  | M      | 8                     | RP, hardening skin, ANA+, Scl70+    | Pred 10mg/day, ASP 100mg/day, Alprostadil 20µg/day, HCQ 400mg/day             | 13  | 52  | F      | -                     |
| 14  | 33  | F      | 189                   | RP, hardening skin, ANA+, Scl70+    | Pred 7.5mg/day, CYC 0.4g/2weeks, Alprostadil 20µg/day, ASP 100mg/day          | 14  | 66  | F      | -                     |
| 15  | 63  | F      | 10                    | RP, hardening skin, ANA+, Scl70+    | Pred 20mg/day, Alprostadil 20µg/day, ASP 100mg/day                            | 15  | 58  | F      | -                     |
| 16  | 35  | F      | 5                     | RP, hardening skin, ANA+, Scl70+    | Pred 10mg/day, MMF 1.5g/day, Alprostadil 20µg/day, ASP 100mg/day              | 16  | 69  | F      | -                     |
| 17  | 50  | F      | 99                    | RP, hardening skin, ANA+            | Pred 7.5mg/day, CYC 0.6g/month, Alprostadil 20µg/day, ASP 100mg/day           | 17  | 25  | F      | -                     |
| 18  | 37  | F      | 118                   | RP, hardening skin, Scl70+          | Pred 30mg/day, CYC 0.4g/2weeks                                                | 18  | 40  | F      | -                     |
| 19  | 57  | F      | 75                    | RP, hardening skin, ANA+, ILD       | Pred 5mg/day, Penicillamine 0.375g/day, ASP 100mg/day                         | 19  | 51  | F      | -                     |
| 20  | 42  | F      | 124                   | RP, hardening skin, ANA+, Scl70+    | Pred 15mg/day, CYC 0.4g/2weeks, ASP 100mg/day                                 | 20  | 67  | F      | -                     |

RP: Raynaud's phenomenon; ANA: anti-nuclear antibody; Scl70: anti scleroderma antibody; ILD: Interstitial lung disease; Pred: prednisone; CYC: Cyclophosphamide; ASP: aspirin; MTX: methotrexate; HCQ: Hydroxychloroquine; MMF: Mycophenolate mofetil
