# Supplementary material
Source: PubMed Central journal article supplement (PMC5385608)
Supplement: cr201711x3.pdf [file cr201711x3.pdf]

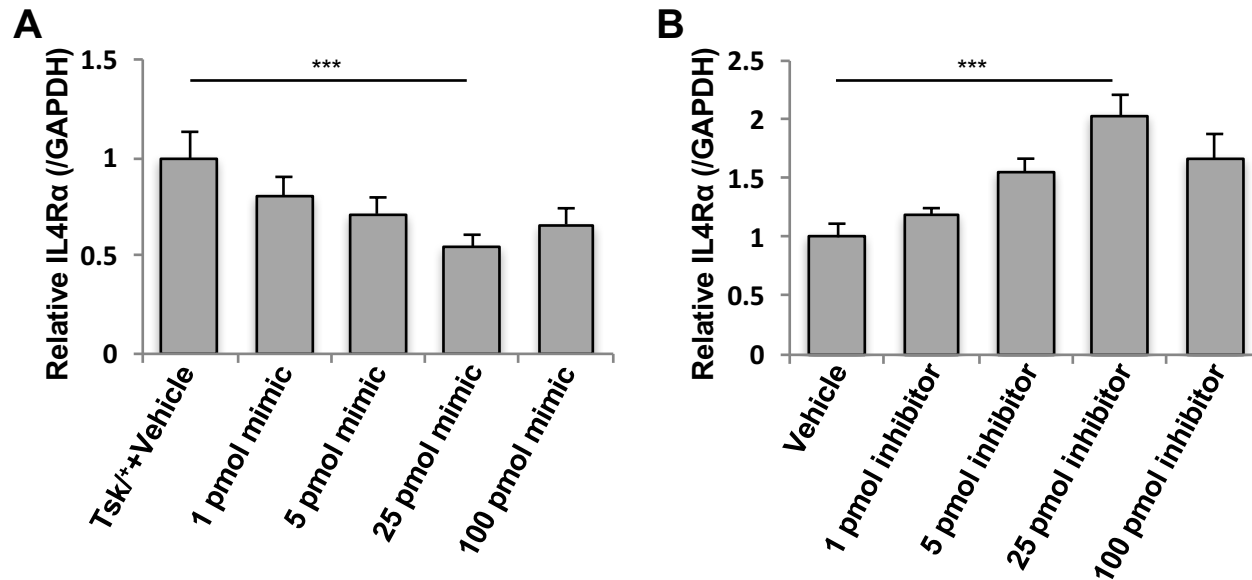

**Supplementary Figure 1. Does responses of miR151-5p mimic and inhibitor. (A)** Does response assay was performed to show that 25 pmole miR151-5p mimic was optimal for *in vitro* treatment in BMMSCs. **(B)** Does response assay was performed to show that 25 pmole miR151-5p inhibitor was optimal for *in vitro* treatment in BMMSCs. The results were representative of three independent experiments. \*\*\*  $P < 0.005$ .
