# Supplementary material
Source: PubMed Central journal article supplement (PMC5385608)
Supplement: cr201711x4.pdf [file cr201711x4.pdf]

A

| Score         | Expect | Identities  | Gaps     | Strand    |
|---------------|--------|-------------|----------|-----------|
| 42.1 bits(21) | 6e-11  | 21/21(100%) | 0/21(0%) | Plus/Plus |

  

|                |                      |    |
|----------------|----------------------|----|
| has-miR-151-5p | CGAGGAGCTCACAGTCTAGT | 21 |
| mmu-miR-151-5p | CGAGGAGCTCACAGTCTAGT | 21 |

B

**hsa-miR-151-5p/IL4R Alignment**

|                                                                |                                                  |
|----------------------------------------------------------------|--------------------------------------------------|
| 3' ugAU-CUGACACUCGAGGAGCu 5' hsa-miR-151-5p<br>    ::     :: : | mirSVR score: -0.0840<br>PhastCons score: 0.4808 |
| 681:5' ugUAUGGCUGGGGCUCCUCGu 3' IL4R                           |                                                  |

  

**IL4R Interleukin 4 receptor** Display 150 bases per row

```
1 GUGCAUGUCCUUGUUGCUGAGUCUGCAGAUGAGGACUAGGGCUUAUCCAUGCCUGGAAAUGCCACCUCCUGGAAGGCAGCCAGGCUGGCAGAUUCCAAGAAACUUGAAGAACCAUGGUUUGAAGGUGAUUGGCCCCACUGACGUUG 150
151 GCCUAACACUGGGCUGCAGAGACUGGACCCCGCCAGCAUUGGGCUGGGCUCGCCACAUCCAUGAGAGUAGAGGGCACUGGGUCGCCGUGCCCCACGGCAGGCCCCUGCAGGAAAACUGAGGCCCUUGGGCACCUCGACUUGUGAACGA 300
301 GUUGUUGGCUGUCUCCUCCACAGCUUCUGCAGCAGACUGUCCUGUUGUAACUGCCCAAGGCAUGUUUUGCCCACCAUGAUGGCCACGUGGAGGCCACCUGCCUCUGUCUCACUGAACUAGAAGCCGAGCCUAGAACAUAACACAG 450
451 CCAUCAAGGGAAUGACUUGGGCGGCCUUGGGAAAUCGAUGAGAAAUUGAACUUCAGGGAGGGUGGUCAUUUGCCUAGAGGUGUCUUAUUAUUAACAGAGCUUCCUAGGUUGAUGCUGGAGGCAGAAUCCCGGUGUCAAGGGGUGUUA 600
601 GUUAAGGGGAGCAACAGAGGACAUGAAAAUUGCUAUGACUAAAGCAGGGACAUUUUGCUGCCAACACCAUGCCAGCUGUAUGGCUGGGGCUCCUCGUUUGCAUGGAACCCCAAGAAUAAUUAUGCUCAGCCACCCUGUGGGCCGG 750
751 GCAAUCCAGACAGCAGGCAUAAGGCACCAGUUAUCCUUGCAUGUUGGCCAGACCUCAGGUGCUAGGGAAGGCGGGAACCUUGGGUUGAGUAAUGCUCGUCUGUGUUUAGUUUCAUCACCUGUUAUCUGUGUUUGCUGAGGAGAGUGG 900
901 AACAGAAGGGGUGGAGUUUUGUAAAAUAAAGUUUUCUUUGUCUCUUU 947
```

**Supplementary Figure 2. miR-151-5p characterization.** (A) Human and mouse miR-151-5p have identical RNA sequences. (B) miR-151-5p was predicted to bind a site in the IL4R $\alpha$  RNA sequence.
