# Supplementary material
Source: PubMed Central journal article supplement (PMC5385608)
Supplement: cr201711x7.pdf [file cr201711x7.pdf]

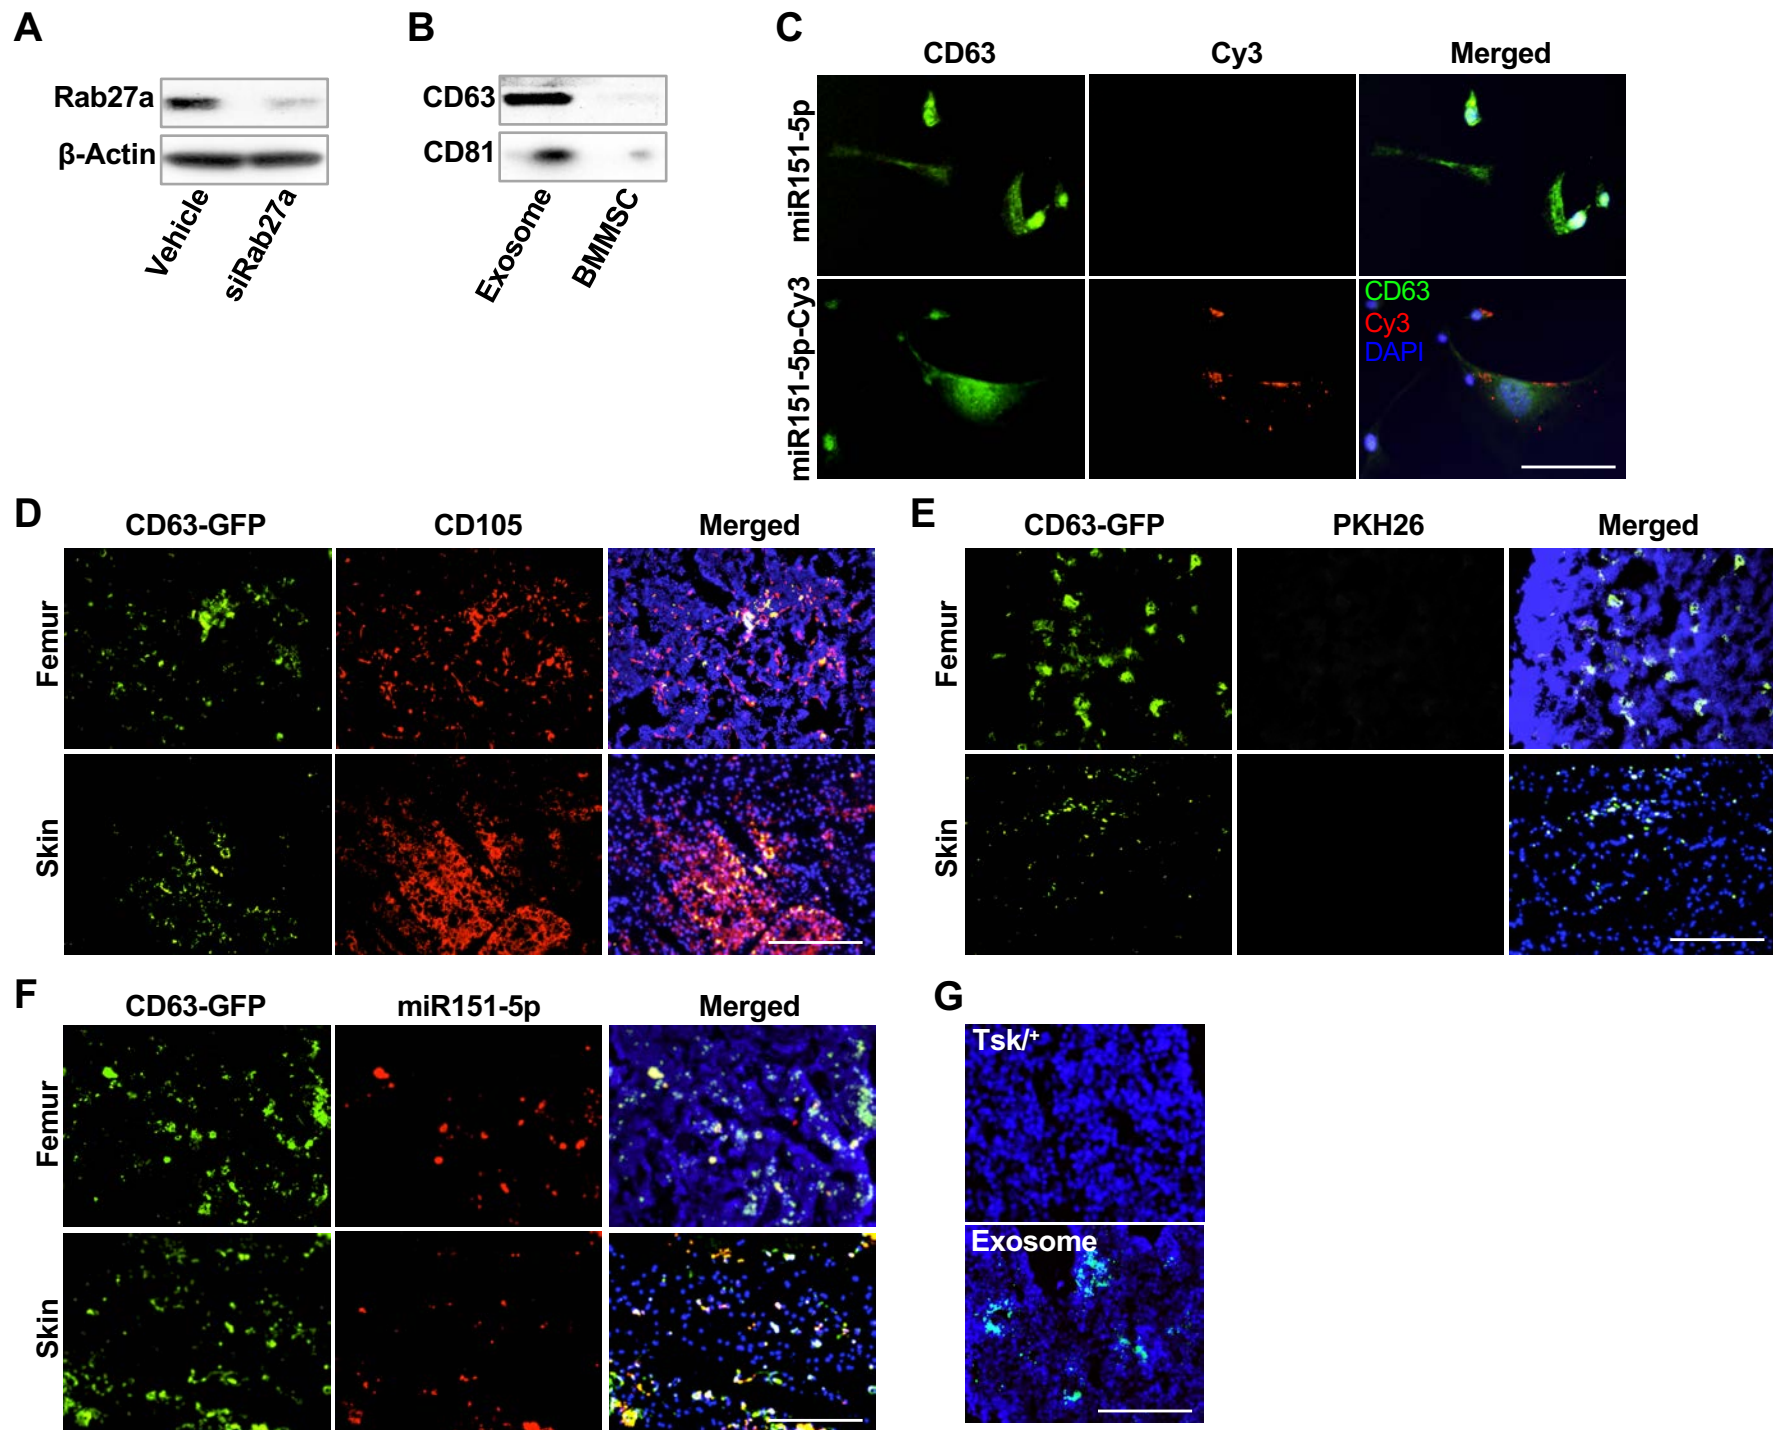

**Supplementary Figure 5. Exosome-mediated miR-151-5p transfer.** (A) Western blotting showing the expression levels of Rab27a in vehicle- and Rab27a siRNA-treated WT BMMSCs.  $\beta$ -Actin was used as a protein loading control. (B) Western blotting showing the expression levels of exosome-specific surface markers CD63 and CD81 in exosomes and WT BMMSCs. (C) To examine whether miR-151-5p is able to transfer *via* exosomes, miR-151-5p was labeled with Cy3 red fluorescence dye and transfected into WT BMMSCs. CD63-positive green immunofluorescence co-localized with miR-151-5p-Cy3 to indicate that exosomes contain miR-151-5p. Scale bar, 25  $\mu$ m. (D) CD63-GFP reporter vector was transfected in BMMSCs and performed MSCT in *Tsk*<sup>+</sup> mice. After MSCT, immunofluorescence (IF) staining showed that CD63 co-localized with BMMSC marker CD105 in both the femur and skin in *Tsk*<sup>+</sup> mice. Scale bar, 25  $\mu$ m. (E) BMMSCs were labeled with red fluorescent dye, followed by transfection of CD63-GFP reporter vector and performed MSCT in *Tsk*<sup>+</sup> mice to show that transplanted BMMSCs were not engrafted into the femur or skin in *Tsk*<sup>+</sup> mice. Scale bar, 25  $\mu$ m. (F) CD63-GFP reporter vector was co-transfected with Cy3-labeled miR151-5p in BMMSCs, which were used to perform MSCT in *Tsk*<sup>+</sup> mice. The data showed that MSCT-secreted CD63-GFP<sup>+</sup> EVs were co-localized with Cy3-miR151-5p in both bone marrow and skin after 24 hours MSC administration, indicating that MSCT was associated with the secretion of exosomal miR151-5p in *Tsk*<sup>+</sup> mice. Scale bar, 25  $\mu$ m. (G) PKH67-labeled exosomes engrafted in bone marrow cells in *Tsk*<sup>+</sup> mice. Scale bar, 25  $\mu$ m.
