# Supplementary material
Source: PubMed Central journal article supplement (PMC5385608)
Supplement: cr201711x8.pdf [file cr201711x8.pdf]

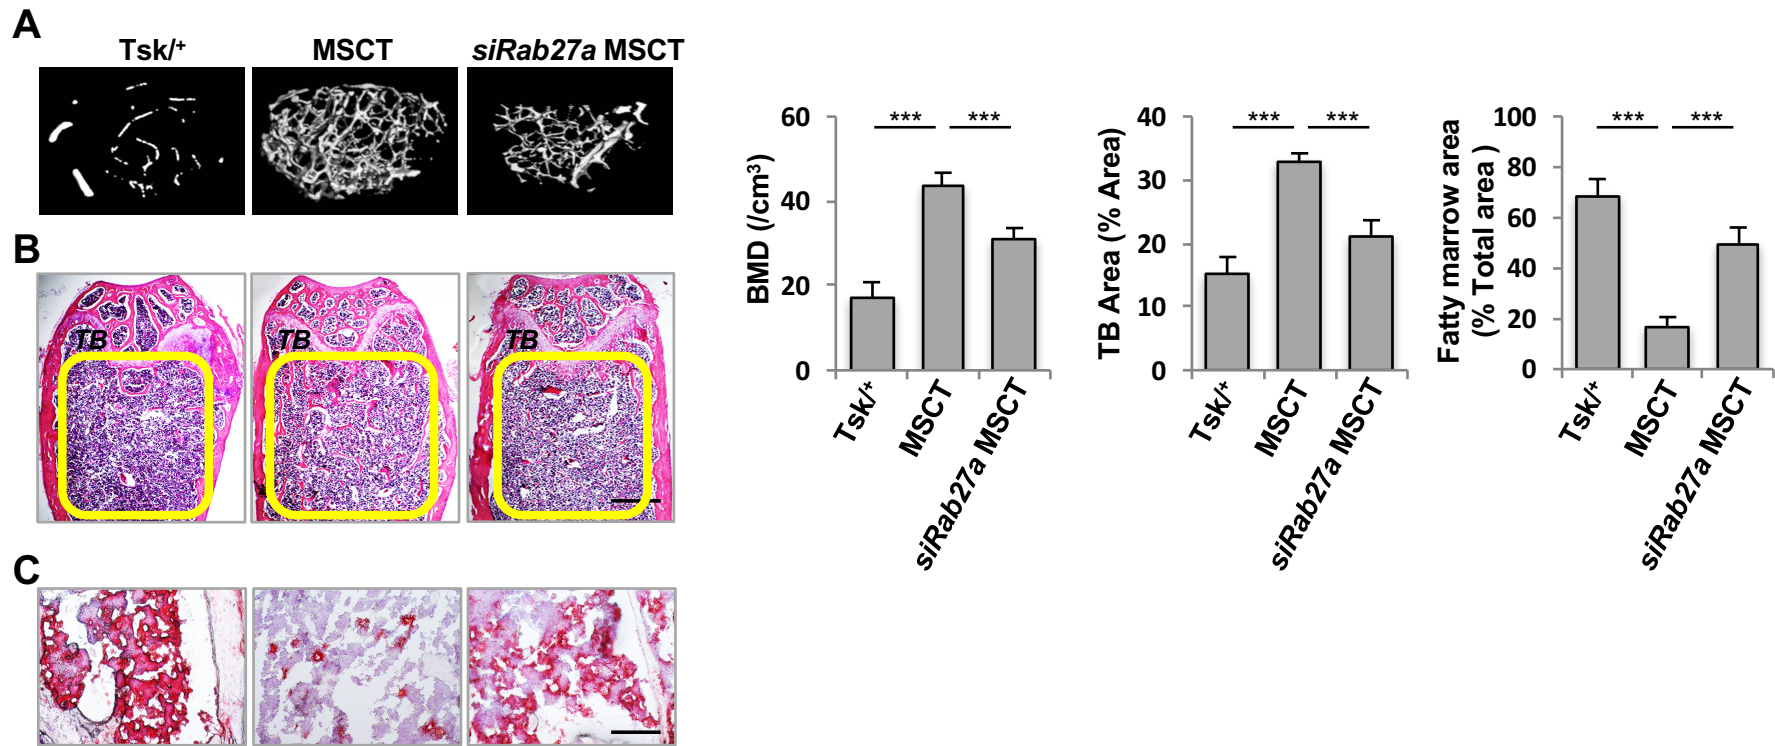

**Supplementary Figure 6. Blockage of Rab27a by siRNA reduced therapeutic effects of MSCT in *Tsk*<sup>+/+</sup> mice.** (A) MicroCT analysis showing BMD and TB area in distal femurs of *Tsk*<sup>+/+</sup>, MSCT-treated *Tsk*<sup>+/+</sup> and siRab27a-MSCT-treated *Tsk*<sup>+/+</sup> mice. (B) H&E staining showing TB volume (yellow-circled area) in *Tsk*<sup>+/+</sup>, MSCT-treated *Tsk*<sup>+/+</sup> and siRab27a-MSCT-treated *Tsk*<sup>+/+</sup> mouse distal femurs. Scale bar, 1 mm. (C) Histological images of distal femurs showing the number of adipocytes in *Tsk*<sup>+/+</sup>, MSCT-treated *Tsk*<sup>+/+</sup> and siRab27a-MSCT-treated *Tsk*<sup>+/+</sup> mouse bone marrow based on Oil red O staining. Scale bar, 50  $\mu\text{m}$ . All experimental data were verified in at least 3 independent experiments. Error bars represent the s.d. from the mean values. \*\*\* $P < 0.005$ .
