# Supplementary material
Source: PubMed Central journal article supplement (PMC5385608)
Supplement: cr201711x11.pdf [file cr201711x11.pdf]

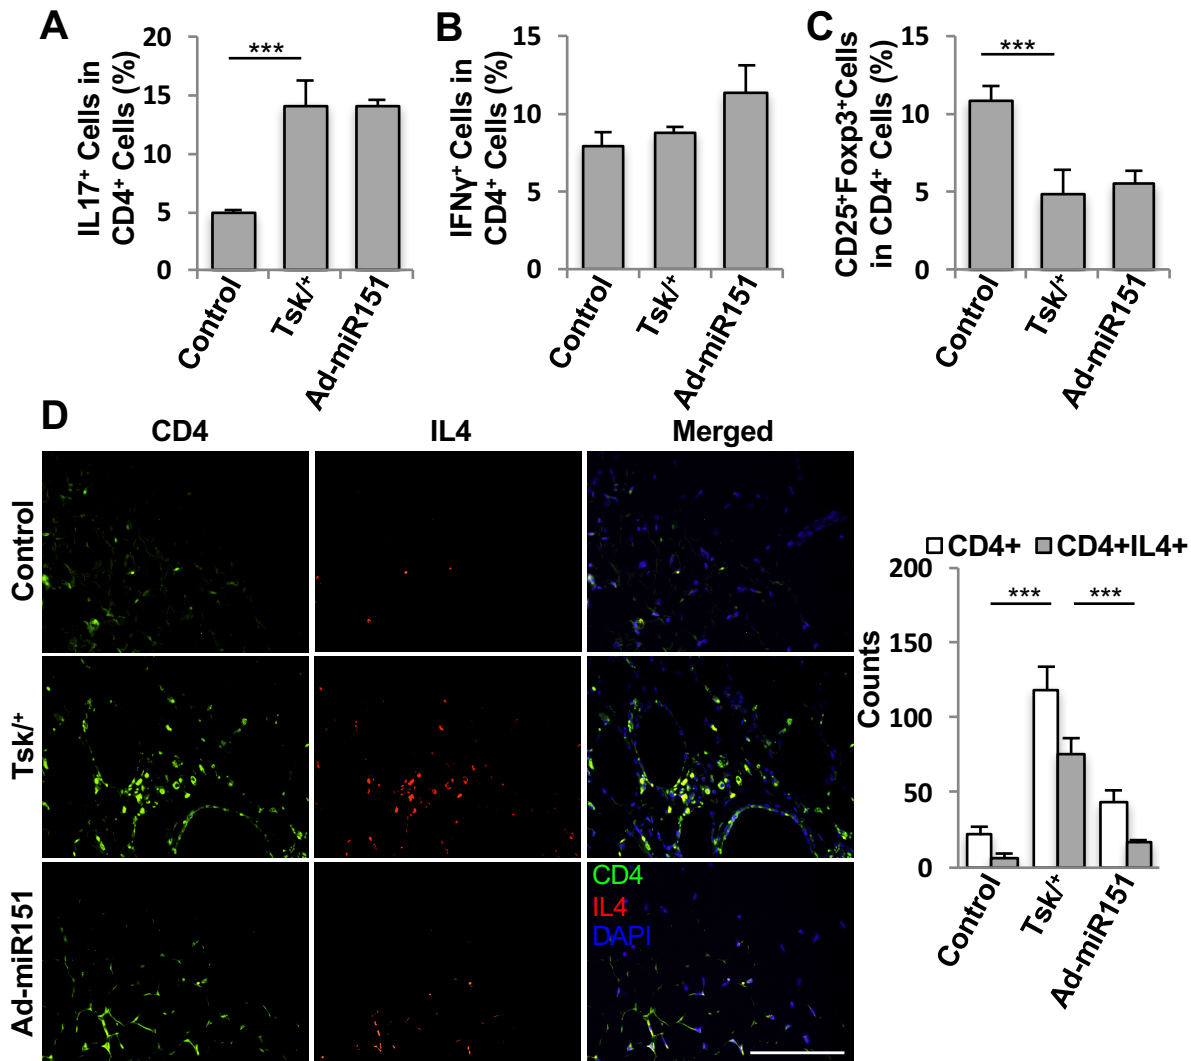

**Supplementary Figure 9. Ad-miR-151 treatment ameliorated T cell infiltration and autoimmune index in *Tsk*<sup>+/+</sup> mice.** (A) Flow cytometric analysis showing the levels of T<sub>H</sub>17 cells in peripheral blood of WT, Ad-GFP, and Ad-miR-151-treated *Tsk*<sup>+/+</sup> mice. (B) Flow cytometric analysis showing the levels of T<sub>H</sub>1 cells in peripheral blood of WT, Ad-GFP, and Ad-miR-151-treated *Tsk*<sup>+/+</sup> mice. (C) Flow cytometric analysis showing the levels of Tregs in the peripheral blood of WT, Ad-GFP, and Ad-miR-151-treated *Tsk*<sup>+/+</sup> mice. (D) CD4 and IL4 double immunofluorescence staining showed significantly increased T<sub>H</sub>2 cell infiltration in the hyperdermal area of *Tsk*<sup>+/+</sup> mice. Ad-miR-151 treatment markedly reduced the infiltration of T<sub>H</sub>2 cell levels in the hyperdermal area of *Tsk*<sup>+/+</sup> mice. Scale bar, 25  $\mu$ m. \*\*\**P*<0.005.
