# Supplementary material
Source: PubMed Central journal article supplement (PMC5385608)
Supplement: cr201711x12.pdf [file cr201711x12.pdf]

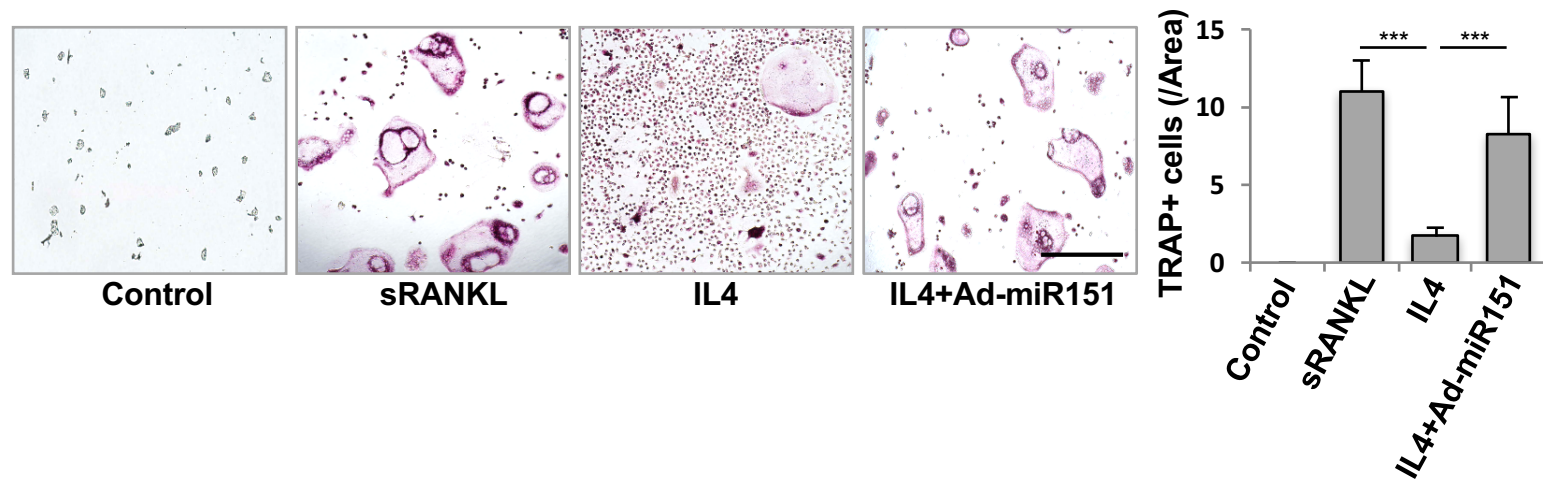

**Supplementary Figure 10. Ad-miR151 treatment rescued IL4-inhibited osteoclastogenesis.** Osteoclast precursor cells were isolated from bone marrow and plated in 24-well plates at  $0.5 \times 10^6$  cells/well with 10 ng/ml M-CSF and cultured for 2 days, following by a 3-day 40 ng/ml soluble RANKL treatment. TRAP staining was performed to detect the number of osteoclasts. IL4 (1 ng/ml) with or without miR151 were used to treat osteoclast precursors with RANKL. The results were representative of three independent experiments. Scale bar, 50  $\mu\text{m}$ . \*\*\*  $P < 0.005$ .
