# Supplementary material
Source: PubMed Central journal article supplement (PMC5385608)
Supplement: cr201711x13.pdf [file cr201711x13.pdf]

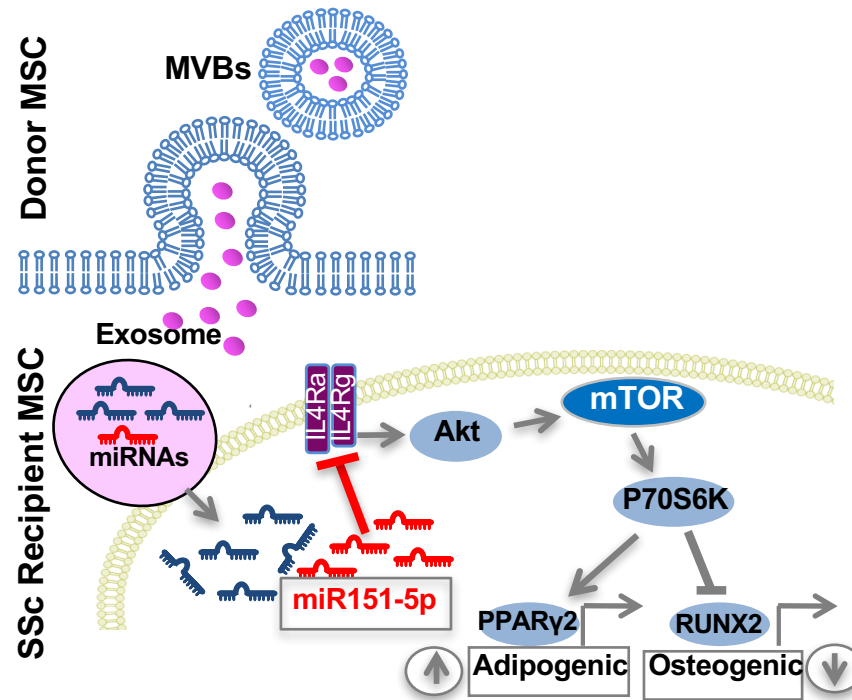

Supplementary Figure 11. Schematic diagram of miR-151-5p transfer from donor MSCs to *Tsk*<sup>+</sup> recipient MSCs to regulate IL4Rα/mTOR signaling.
