# Supplementary material
Source: PubMed Central journal article supplement (PMC5385608)
Supplement: cr201711x14.pdf [file cr201711x14.pdf]

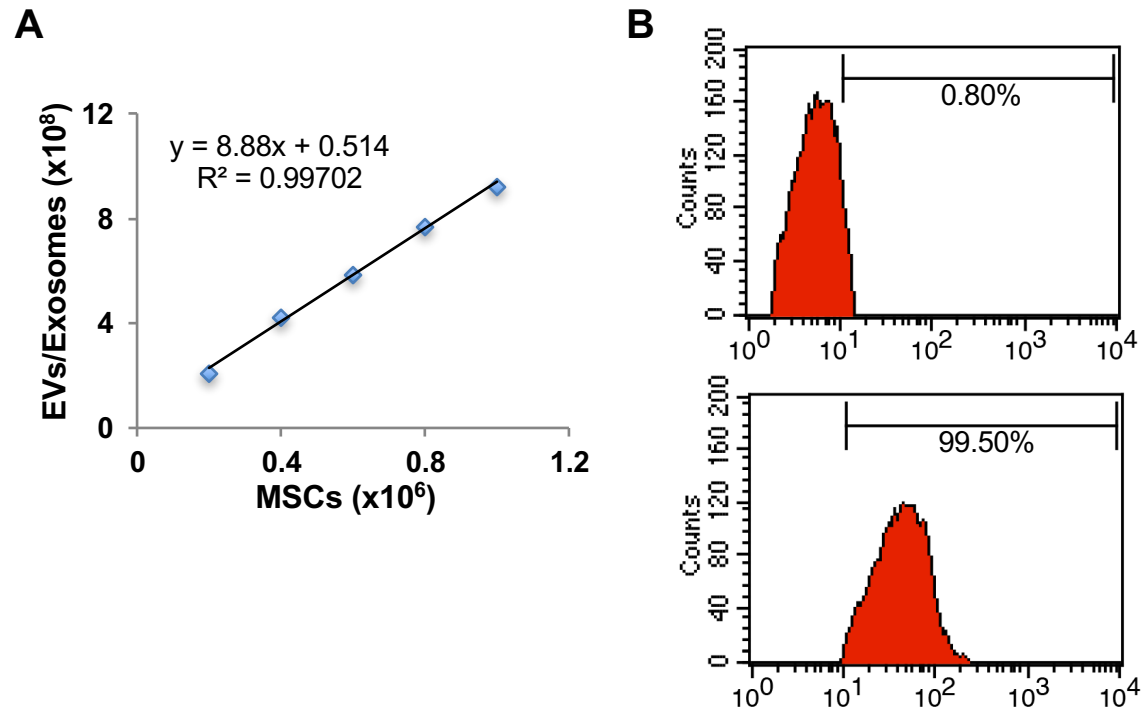

**Supplementary Figure 12. Quantification and Characterization of EVs.** (A) EV numbers were quantified by EXOCEP exosome quantitation kit. (B) Exosome purity was examined by Exo-flow kits with CD63 beads and showed that 99.5% EVs isolated by differential centrifugation were CD63 positive.
